# Supplementary material for: An Effective Modification Strategy to Build Multifunctional Peptides Based on a Trypsin Inhibitory Peptide of the Kunitz Family
Source: MDPI journal article supplement (doi:10.3390/pharmaceutics16050597), 2024-04-27
Supplement: s1 [file s1]

# Supplementary Materials: An Effective Modification Strategy to Build Multifunctional Peptides Based on a Trypsin Inhibitory Peptide of the Kunitz Family

Ying Wang, Daning Shi, Wanchen Zou, Yangyang Jiang, Tao Wang, Xiaoling Chen, Chengbang Ma, Wei Li, Tianbao Chen, James F. Burrows, Lei Wang and Mei Zhou

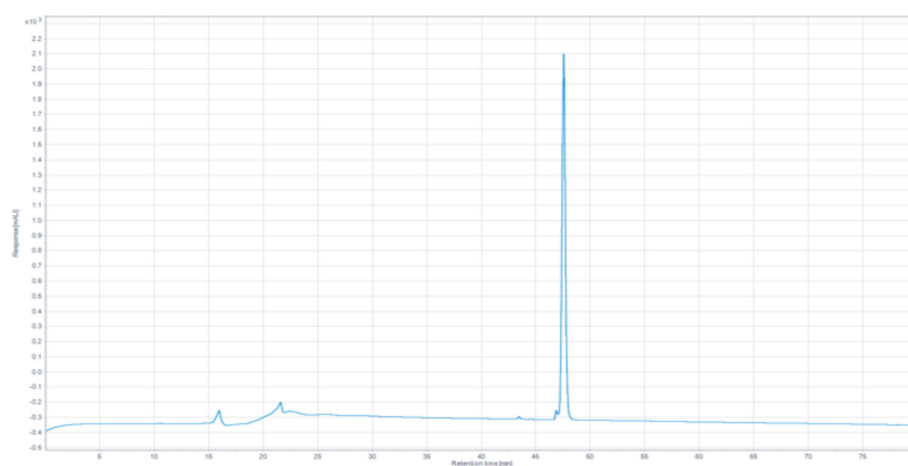

(a)

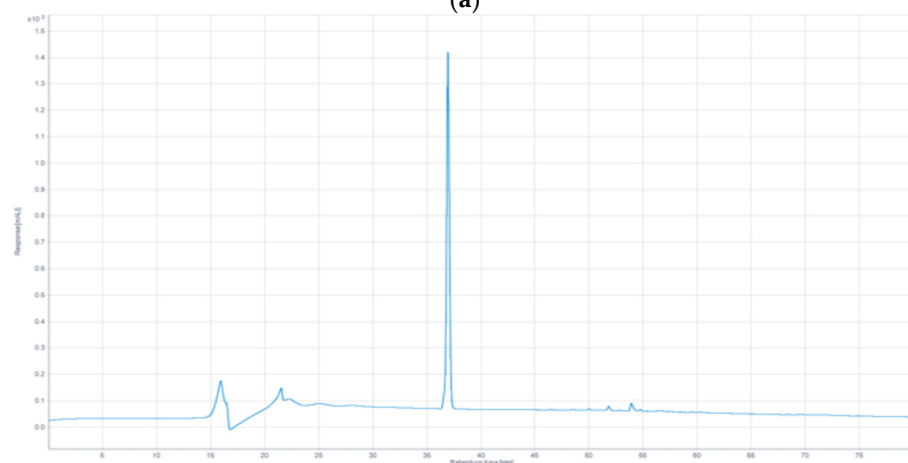

(b)

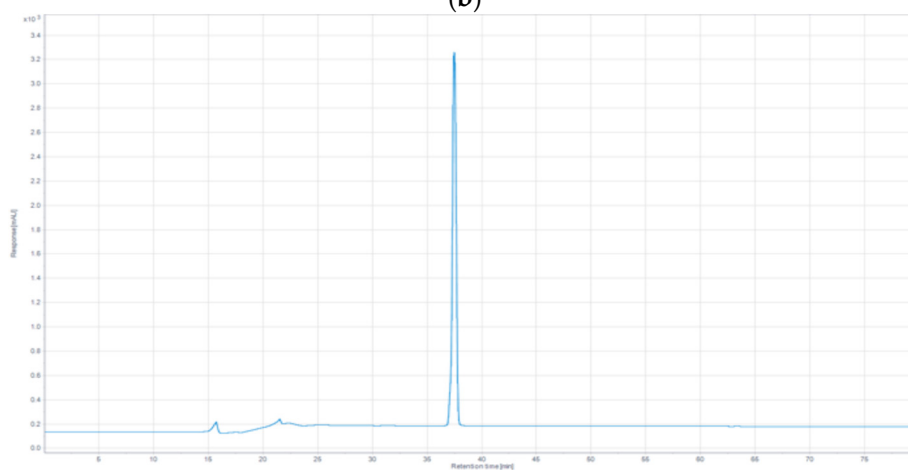

(c)

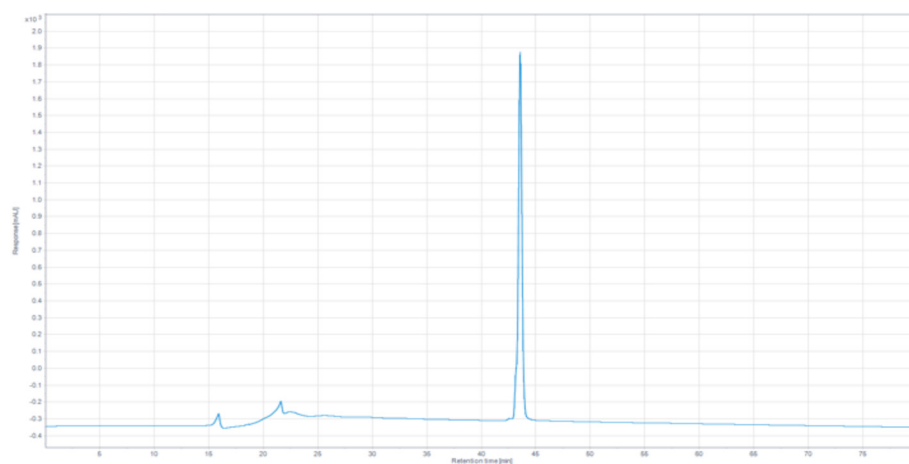

(d)

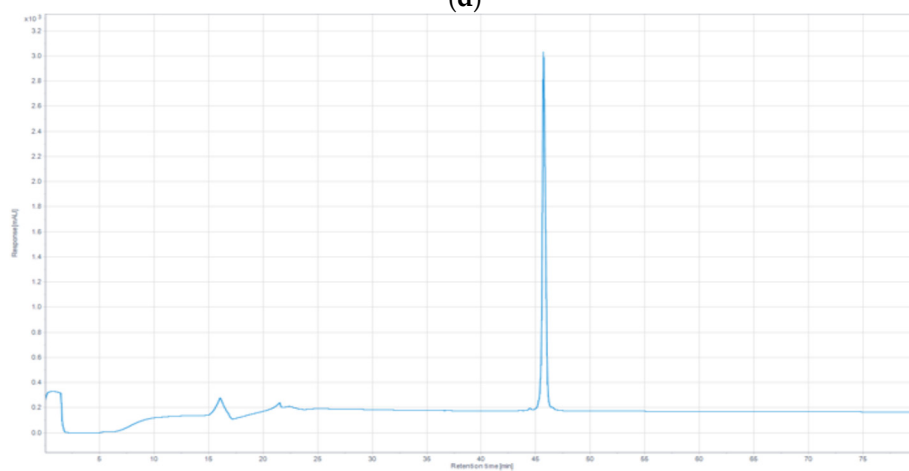

(e)

**Figure S1:** Purity of (a) OSTI-1949, (b) OSTI-1716, (c) OSTI-1696, (d) OSTI-2363, and (e) OSTI-2461 was confirmed by RP-HPLC.

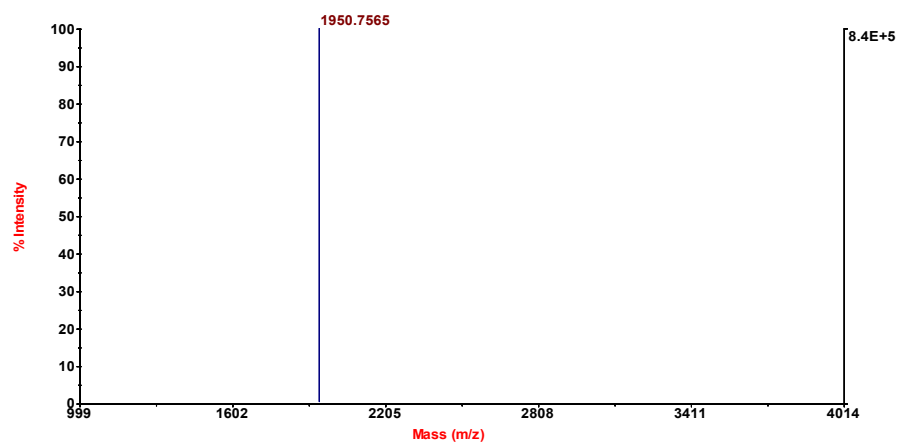

(a)

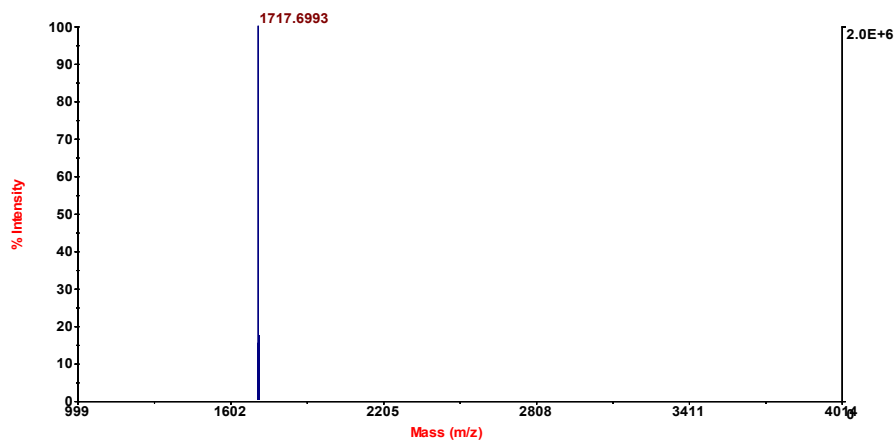

(b)

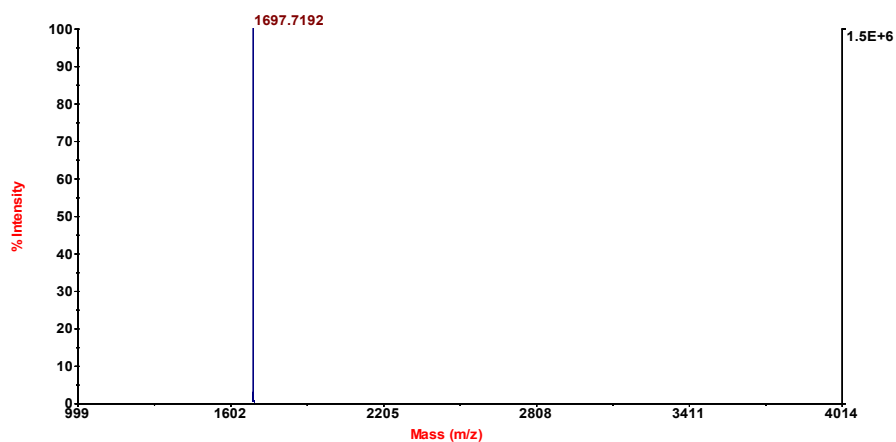

(c)

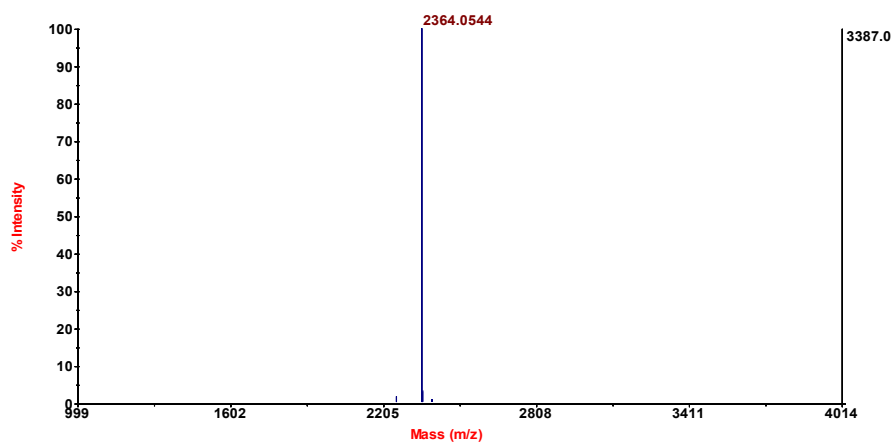

(d)

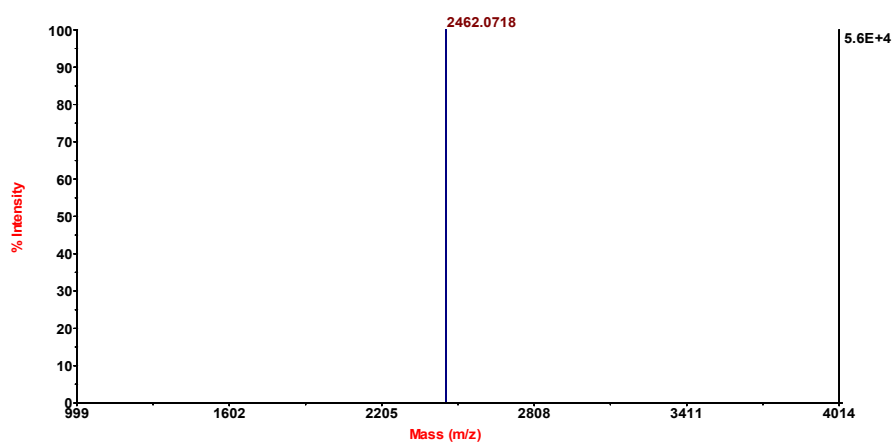

(e)

**Figure S2:** MALDI-TOF MS spectrometry of the five synthetic peptides: (a) OSTI-1949, (b) OSTI-1716, (c) OSTI-1696, (d) OSTI-2363 and (e) OSTI-2461.
